# Supplementary material for: Forecasting Staphylococcus aureus Infections Using Genome-Wide Association Studies, Machine Learning, and Transcriptomic Approaches
Source: PubMed Central journal article supplement (PMC9426533; doi:10.1128/msystems.00378-22), 2022-07-05
Supplement: msystems.00378-22-sf001.pdf [file msystems.00378-22-sf001.pdf]

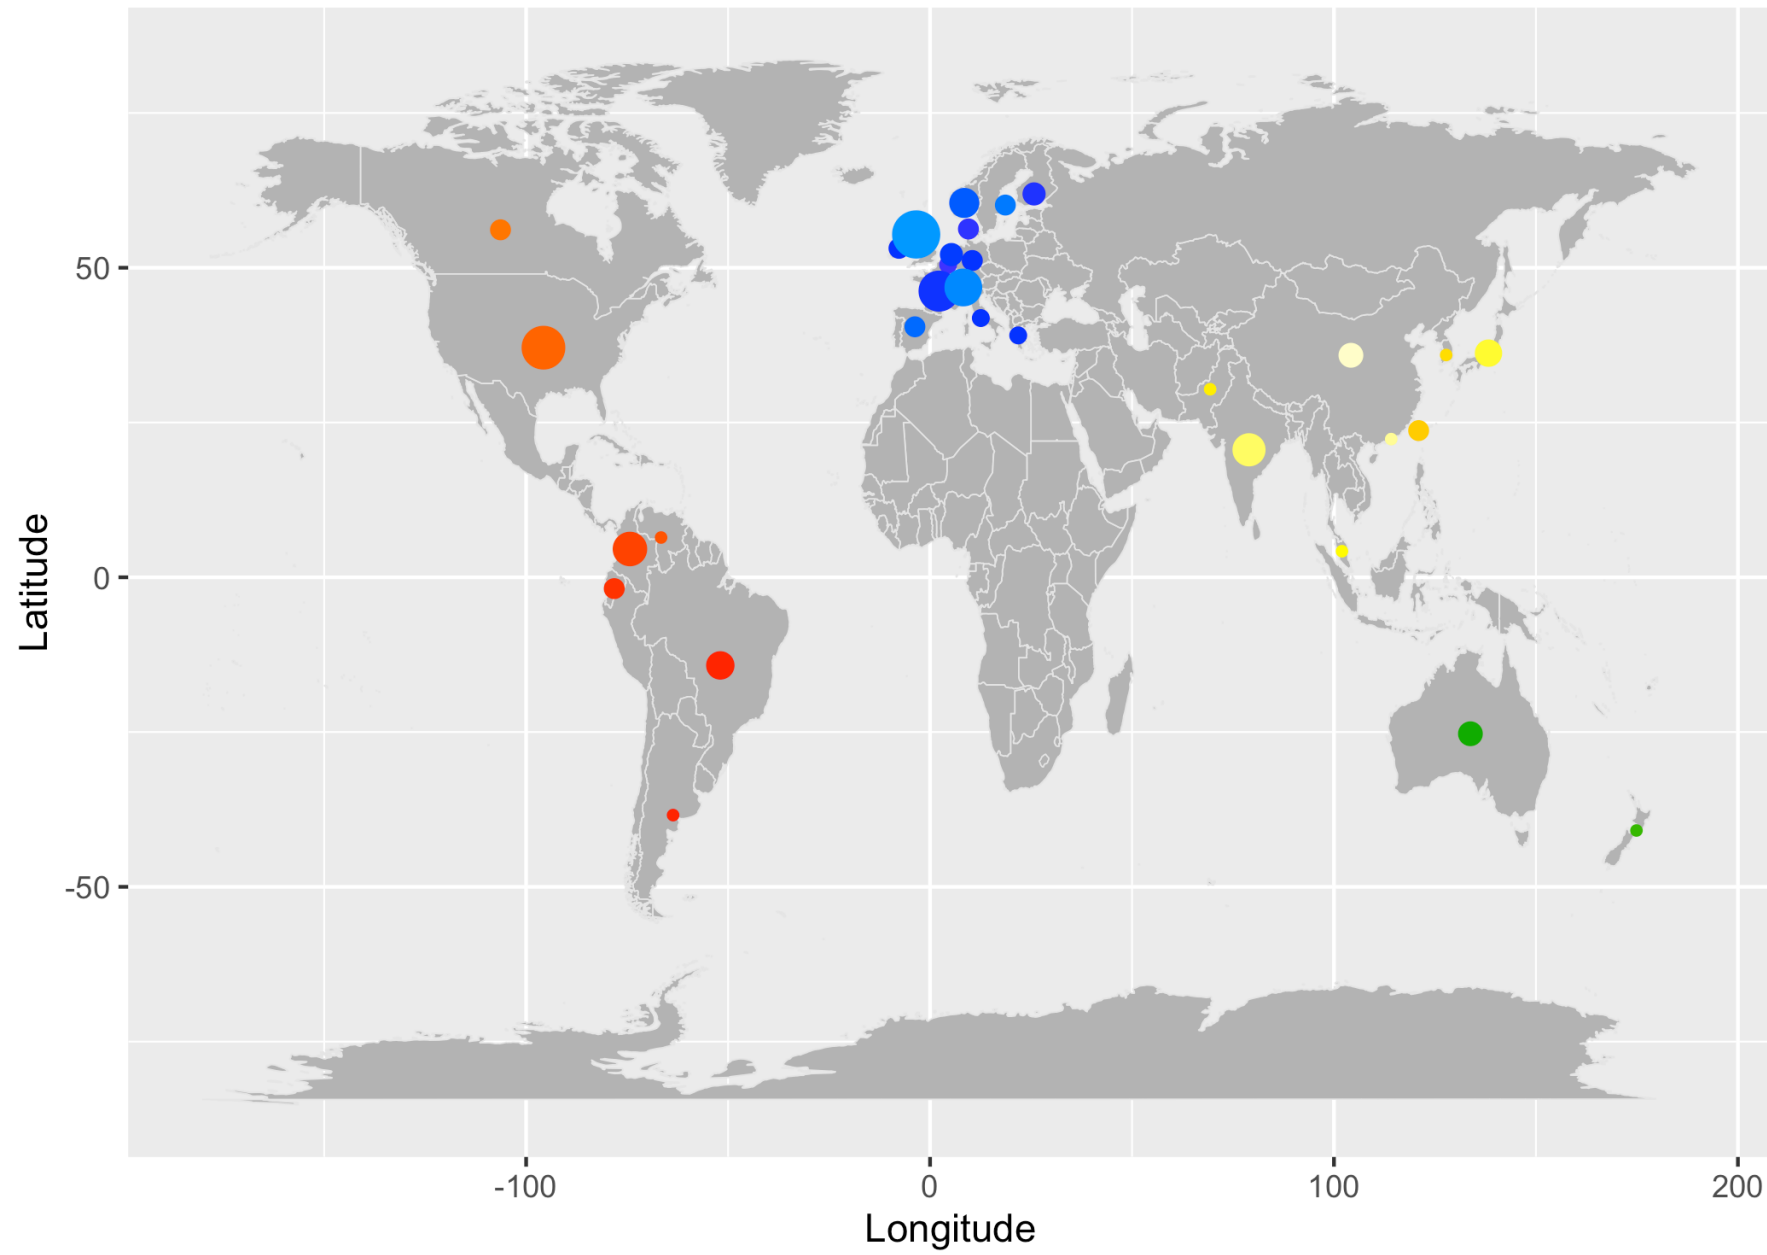

Country (Number of isolates)

- Argentina (1)
- Australia (5)
- Belgium (2)
- Brazil (8)
- Canada (3)
- Chili (1)
- China (5)
- Colombia (18)
- Denmark (3)
- Ecuador (3)
- Finland (4)
- France (42)
- Germany (3)
- Greece (2)
- Hong Kong (1)
- India (15)
- Ireland (3)
- Italy (2)
- Japan (7)
- Malaysia (1)
- Netherlands (4)
- New Zealand (1)
- Northern Ireland (1)
- Norway (10)
- Pakistan (1)
- South Korea (1)
- Spain (3)
- Sweden (3)
- Switzerland (28)
- Taiwan (3)
- United Kingdom (110)
- USA (61)
- Venezuela (1)
