# Supplementary material for: Forecasting Staphylococcus aureus Infections Using Genome-Wide Association Studies, Machine Learning, and Transcriptomic Approaches
Source: PubMed Central journal article supplement (PMC9426533; doi:10.1128/msystems.00378-22), 2022-07-05

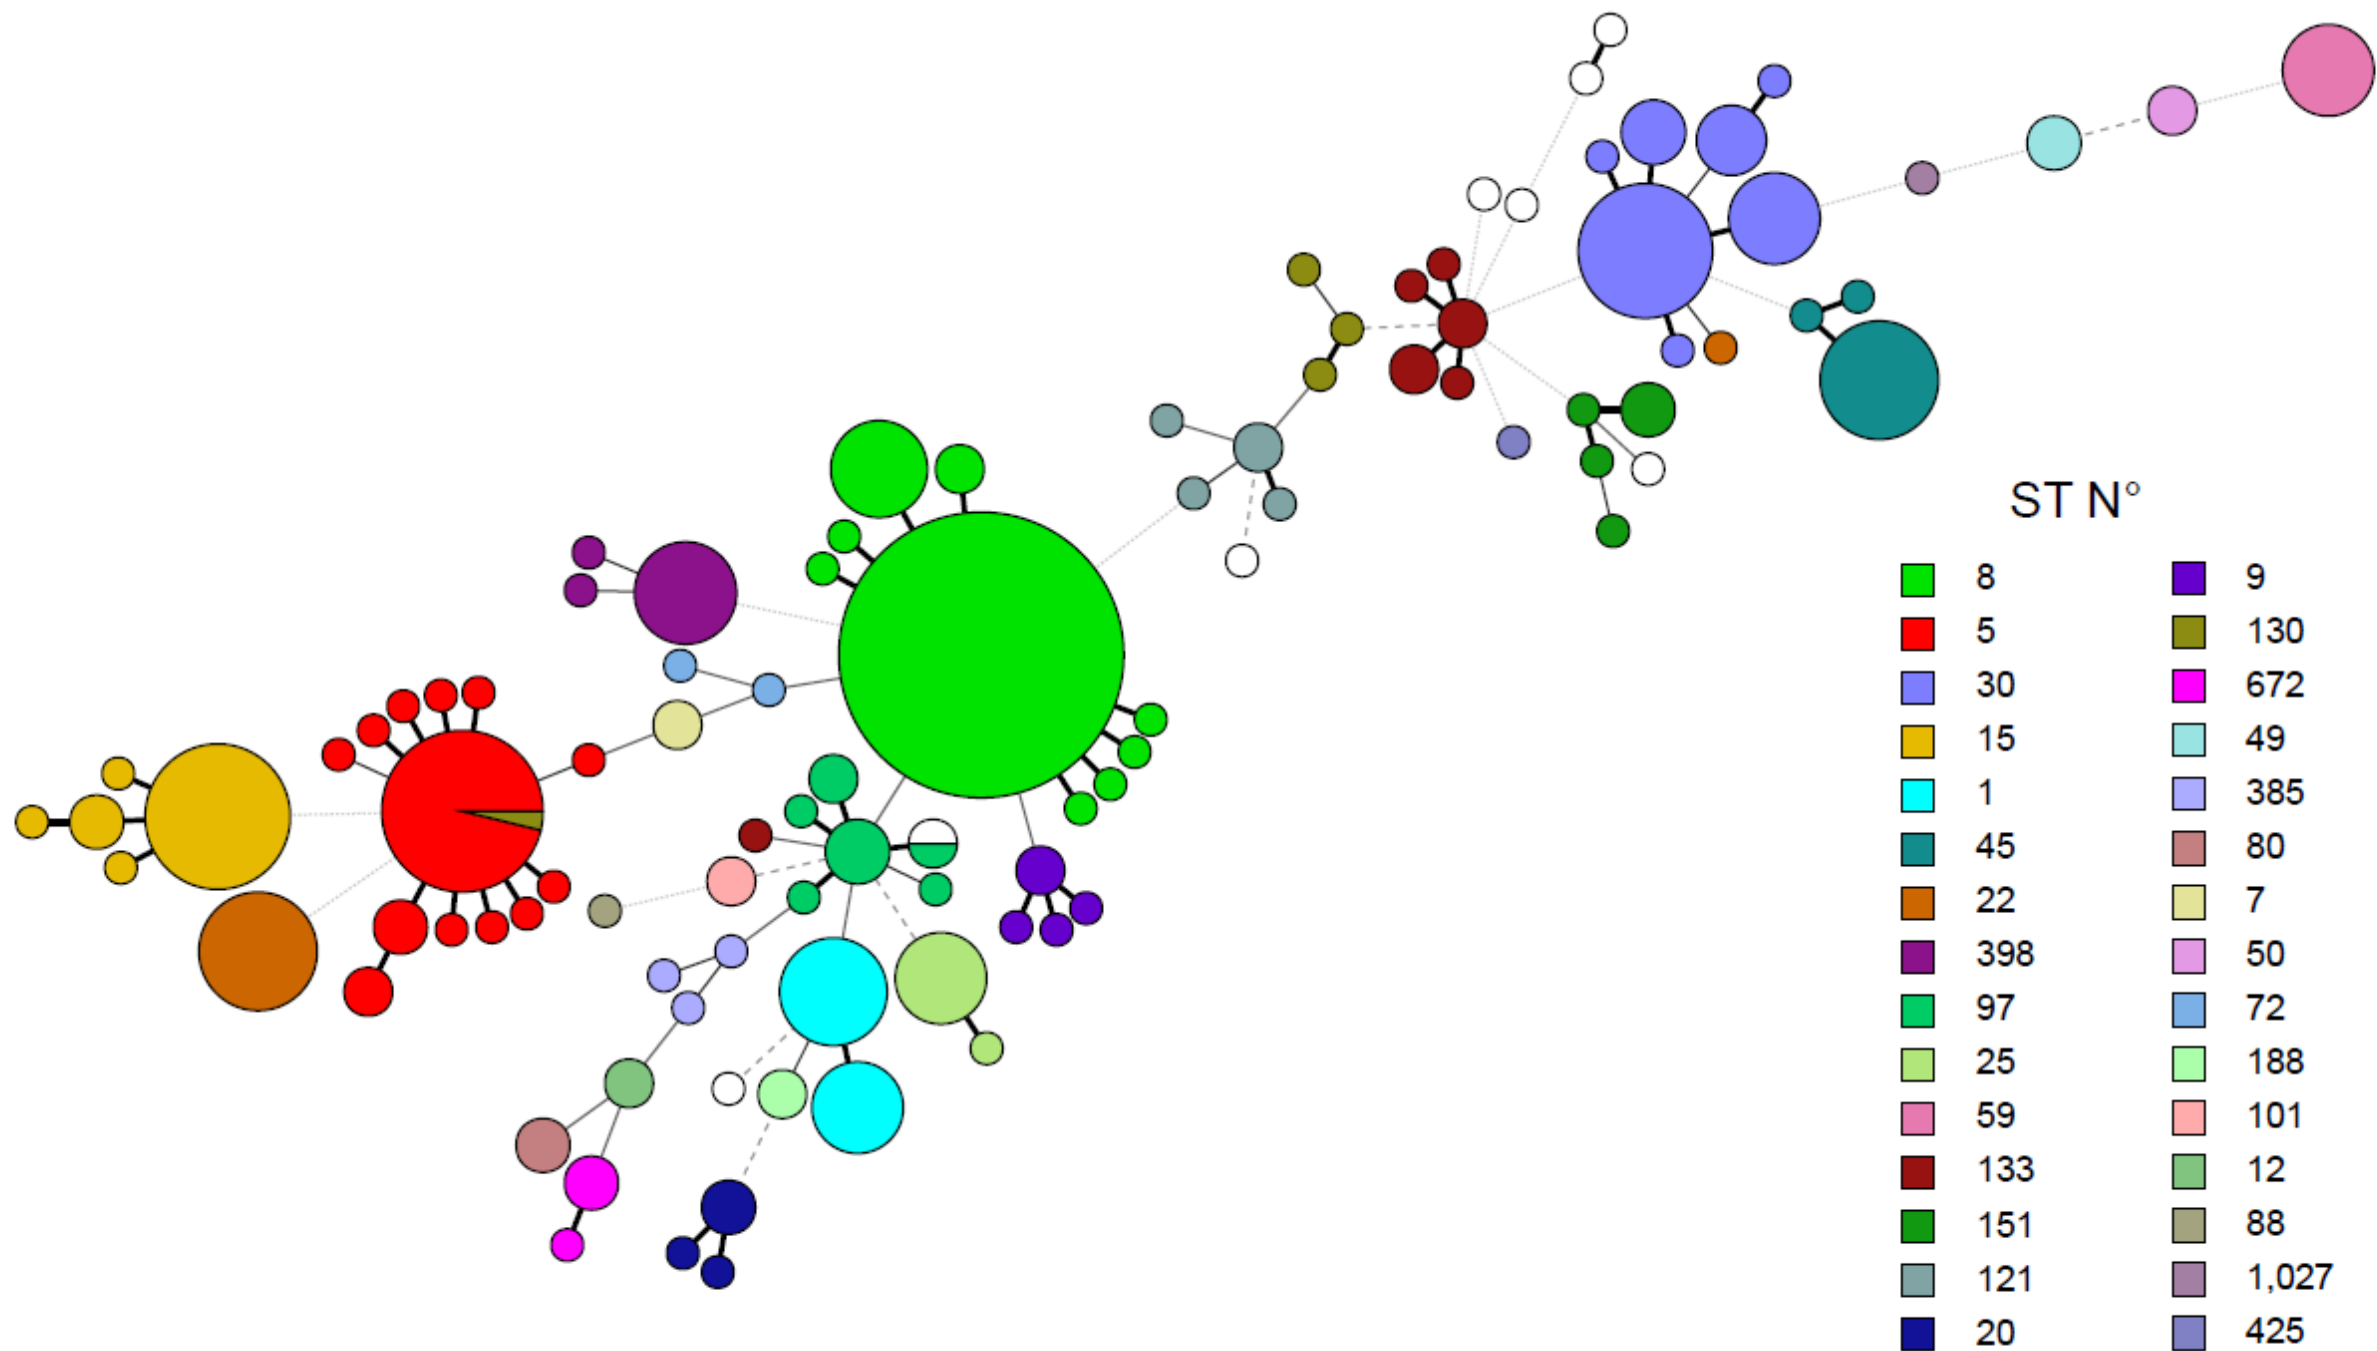

Supplement: msystems.00378-22-sf002.pdf [file msystems.00378-22-sf002.pdf]
